# Supplementary material for: Deep Learning Convolutional Neural Network Reconstruction and Radial k-Space Acquisition MR Technique for Enhanced Detection of Retropatellar Cartilage Lesions of the Knee Joint
Source: MDPI journal article supplement (doi:10.3390/diagnostics13142438), 2023-07-21
Supplement: s1 [file s1]

**Table S1.** Database search table.

|                        |                                                                                                                                                                                      |                                                                                                                      |                         |      |
|------------------------|--------------------------------------------------------------------------------------------------------------------------------------------------------------------------------------|----------------------------------------------------------------------------------------------------------------------|-------------------------|------|
| <b>Database</b>        | <b>Pubmed</b>                                                                                                                                                                        |                                                                                                                      |                         |      |
| <b>Search Keywords</b> | "deep learning AND propeller AND MRI"                                                                                                                                                |                                                                                                                      |                         |      |
| <b>Results</b>         | Title                                                                                                                                                                                | Authors                                                                                                              | Journal                 | Year |
| 1                      | Deep Learning and Imaging for the Orthopaedic Surgeon: How Machines "Read" Radiographs.                                                                                              | Hill BG, Krogue JD, Jevsevar DS, Schilling PL.                                                                       | J Bone Joint Surg Am.   | 2022 |
| 2                      | Comparison of deep learning-based reconstruction of PROPELLER Shoulder MRI with conventional reconstruction                                                                          | Hahn S, Yi J, Lee HJ, Lee Y, Lee J, Wang X, Fung M                                                                   | Skeletal Radiol.        | 2023 |
| 3                      | Impact of Deep Learning Reconstruction Combined With a Sharpening Filter on Single-Shot Fast Spin-Echo T2-Weighted Magnetic Resonance Imaging of the Uterus.                         | Tsuboyama T, Onishi H, Nakamoto A, Ogawa K, Koyama Y, Tarewaki H, Tomiyama N.                                        | Invest Radiol.          | 2022 |
| 4                      | Scientific Advances and Technical Innovations in Musculoskeletal Radiology.                                                                                                          | Fritz J, Runge VM.                                                                                                   | Invest Radiol.          | 2023 |
| 5                      | Application of deep learning-based image reconstruction in MR imaging of the shoulder joint to improve image quality and reduce scan time.                                           | Kaniewska M, Deininger-Czermak E, Getzmann JM, Wang X, Lohezic M, Guggenberger R.                                    | Eur Radiol.             | 2023 |
| 6                      | A Feasibility Study on Deep Learning Reconstruction to Improve Image Quality With PROPELLER Acquisition in the Setting of T2-Weighted Gynecologic Pelvic Magnetic Resonance Imaging. | Saleh M, Virarkar M, Javadi S, Mathew M, Vulasala SSR, Son JB, Sun J, Bayram E, Wang X, Ma J, Szklaruk J, Bhosale P. | J Comput Assist Tomogr. | 2023 |
| <b>Database</b>        | <b>Pubmed</b>                                                                                                                                                                        |                                                                                                                      |                         |      |
| <b>Search Keywords</b> | "deep learning AND propeller AND MRI AND knee"                                                                                                                                       |                                                                                                                      |                         |      |
| <b>Results</b>         | "No results were found."                                                                                                                                                             |                                                                                                                      |                         |      |
|                        |                                                                                                                                                                                      |                                                                                                                      |                         |      |
|                        |                                                                                                                                                                                      |                                                                                                                      |                         |      |
| <b>Database</b>        | <b>Scopus</b>                                                                                                                                                                        |                                                                                                                      |                         |      |

|                        |                                                                                                                                           |                                                                                     |                                                                           |                                                                                                       |
|------------------------|-------------------------------------------------------------------------------------------------------------------------------------------|-------------------------------------------------------------------------------------|---------------------------------------------------------------------------|-------------------------------------------------------------------------------------------------------|
| <b>Search Keywords</b> | "deep learning AND propeller AND MRI"                                                                                                     |                                                                                     |                                                                           |                                                                                                       |
| <b>Results</b>         | Title                                                                                                                                     | Authors                                                                             | Journal                                                                   | Details                                                                                               |
| 1                      | Comparison of deep learning-based reconstruction of PROPELLER Shoulder MRI with conventional reconstruction                               | Hahn, S., Yi, J., Lee, H.-J., Wang, X., Fung, M.                                    | Skeletal Radiology                                                        | 52(8), pp. 1545–1555                                                                                  |
| 2                      | Application of deep learning-based image reconstruction in MR imaging of the shoulder joint to improve image quality and reduce scan time | Kaniewska, M., Deininger-Czermak, E., Getzmann, J.M., Lohezic, M., Guggenberger, R. | European Radiology                                                        | 33(3), pp. 1513–1525                                                                                  |
| 3                      | Breast Diffusion MRI Acquisition and Processing Techniques: The GE Healthcare Perspective                                                 | Shimakawa, A., Bayram, E.                                                           | Diffusion MRI of the Breast                                               | pp. 251–25                                                                                            |
| 4                      | The Reconstruction Method Using Compressed Sensing and Convolutional Neural Network for PROPELLER MRI in Head                             | Matsumoto, Y., Hori, K., Tadano, K., Endo, Y., Hashimoto, T.                        | 2021 IEEE Nuclear Science Symposium and Medical Imaging Conference Record | NSS/MIC 2021 and 28th International Symposium on Room-Temperature Semiconductor Detectors, RTSD 2022, |
| <b>Database</b>        | <b>Scopus</b>                                                                                                                             |                                                                                     |                                                                           |                                                                                                       |
| <b>Search Keywords</b> | "deep learning AND propeller AND MRI AND knee"                                                                                            |                                                                                     |                                                                           |                                                                                                       |
| <b>Results</b>         | "No documents matching your keywords were found."                                                                                         |                                                                                     |                                                                           |                                                                                                       |
|                        |                                                                                                                                           |                                                                                     |                                                                           |                                                                                                       |
|                        |                                                                                                                                           |                                                                                     |                                                                           |                                                                                                       |
| <b>Database</b>        | <b>Web of Science</b>                                                                                                                     |                                                                                     |                                                                           |                                                                                                       |
| <b>Search Keywords</b> | "deep learning AND propeller AND MRI"                                                                                                     |                                                                                     |                                                                           |                                                                                                       |
| <b>Results</b>         | Title                                                                                                                                     | Authors                                                                             | Journal                                                                   | Details                                                                                               |
| 1                      | Comparison of deep learning-based reconstruction of PROPELLER Shoulder MRI with conventional reconstruction                               | Hahn, S; Yi, J; (...); Fung, M                                                      | SKELETAL RADIOLOGY                                                        | 52 (8), pp.1545-1555                                                                                  |

|                        |                                                                                                                                                             |                                                            |                                                         |                         |
|------------------------|-------------------------------------------------------------------------------------------------------------------------------------------------------------|------------------------------------------------------------|---------------------------------------------------------|-------------------------|
| 2                      | Application of deep learning-based image reconstruction in MR imaging of the shoulder joint to improve image quality and reduce scan time                   | Kaniewska, M; Deininger-Czermak, E; (...); Guggenberger, R | EUROPEAN RADIOLOGY                                      | 33 (3) , pp.1513-1525   |
| 3                      | Impact of Deep Learning Reconstruction Combined With a Sharpening Filter on Single-Shot Fast Spin-Echo T2-Weighted Magnetic Resonance Imaging of the Uterus | Tsuboyama, T; Onishi, H; (...); Tomiyama, N                | INVESTIGATIVE RADIOLOGY                                 | 57 (6) , pp.379-386     |
| 4                      | Dual-domain self-supervised learning for accelerated non-Cartesian MRI reconstruction                                                                       | Zhou, B; Schlemper, J; (...); Sofka, M                     | MEDICAL IMAGE ANALYSIS                                  | 81                      |
| 5                      | Comprehensive Clinical Evaluation of a Deep Learning-Accelerated, Single-Breath-Hold Abdominal HASTE at 1.5 T and 3 T                                       | Herrmann, J; Wessling, D; (...); Othman, AE                | ACADEMIC RADIOLOGY                                      | 30 (1) , pp.93-102      |
| 6                      | Pediatric brain extraction from T2-weighted MR images using 3D dual frame U-net and human connectome database                                               | Kim, D; Chae, JH and Han, Y                                | INTERNATIONAL JOURNAL OF IMAGING SYSTEMS AND TECHNOLOGY | 29 (4) , pp.476-482     |
| 7                      | Stochastic optimization of three-dimensional non-Cartesian sampling trajectory                                                                              | Wang, GH; Nielsen, JF; (...); Noll, DC                     | Magn Reson Med                                          | Apr 2023 (Early Access) |
| 8                      | Motion artifact reduction for magnetic resonance imaging with deep learning and k-space analysis                                                            | Cui, L; Song, Y; (...); Yang, G                            | PLOS ONE                                                | 18 (1)                  |
| <b>Database</b>        | <b>Web of Science</b>                                                                                                                                       |                                                            |                                                         |                         |
| <b>Search Keywords</b> | "deep learning AND propeller AND MRI AND knee"                                                                                                              |                                                            |                                                         |                         |
| <b>Results</b>         | "No records were found to match your filter"                                                                                                                |                                                            |                                                         |                         |
